# Supplementary material for: Role of the disulfide bond on the structure and activity of μ-conotoxin PIIIA in the inhibition of NaV1.4
Source: Royal Society of Chemistry journal article supplement (doi:10.1039/c8ra06103c), 2019-01-01

### Supplementary material

**Table S1. Collocation conditions of buffer A and B.**

| Name            | H <sub>2</sub> O (%) | Acetonitrile (%) | TFA (%) |
|-----------------|----------------------|------------------|---------|
| <b>Buffer A</b> | 90                   | 10               | 0.05    |
| <b>Buffer B</b> | 10                   | 90               | 0.05    |

**Table S2. Determination of peptide quality used by Circular Dichroism Spectra (CD).**

| peptide  | quality |
|----------|---------|
| PIIIA*   | 1mg     |
| PIIIA*-1 | 2.4mg   |
| PIIIA*-2 | 2.1mg   |
| PIIIA*-3 | 1mg     |

**Table S3. Test the concentration and supply of the compounds.** The concentration of the test compound is 3mM. Soluble in dimethyl sulfoxide (DMSO). On the day of the test, the cells were dissolved in extracellular fluid. Compound PIIIA\* was sent to the sample before, and the concentration was 0.9mM.

| Compound | Molecular weight | Purity | Test concentration | Storage conditions |
|----------|------------------|--------|--------------------|--------------------|
|----------|------------------|--------|--------------------|--------------------|

|          |         |     |            |       |
|----------|---------|-----|------------|-------|
| PIIIA*   | 2591.13 | 95% | 0.1, 0.3 1 | -20°C |
| PIIIA*-1 | 2529.00 | 95% | 1 ,3 ,10   | -20°C |
| PIIIA*-2 | 2529.00 | 95% | 1 ,3 ,10   | -20°C |
| PIIIA*-3 | 2529.00 | 95% | 1 ,3 ,10   | -20°C |

**Table S4. Molecular weight and yield of peptide synthesized.** Molecular weight include theoretical molecular weight (TMW) and determination of molecular weight (DMW). Yield refers to the output of the final product.

| Peptide  | TMW[<br>M+3] | DMW[<br>M+3] | TMW[<br>M+4] | DMW[<br>M+4] | TMW[<br>M+5] | DMW[<br>M+5] | TMW[<br>M+6] | DMW[<br>M+6] | Yield     |
|----------|--------------|--------------|--------------|--------------|--------------|--------------|--------------|--------------|-----------|
| PIIIA*-1 | 844.0        | 843.9        | 633.2        | 633.1        | 506.8        | -            | 422.5        | -            | 4.6<br>mg |
| PIIIA*-2 | 844.0        | -            | 633.2        | 633.4        | 506.8        | 506.7        | 422.5        | -            | 3.6<br>mg |
| PIIIA*-3 | 844.0        | 844.2        | 633.2        | 633.2        | 506.8        | 506.7        | 422.5        | 422.4        | 3.0<br>mg |

**Figure S1.** (A-1), (A-2) and (A-3) represent high-resolution ESI-MS analysis of final product PIIIA\*-1, PIIIA\*-2, and PIIIA\*-3, respectively. (B-1), (B-2) and (B-3) represent RP-HPLC traces of PIIIA\*-1, PIIIA\*-2, and PIIIA\*-3.

(A-1) ESI-MS

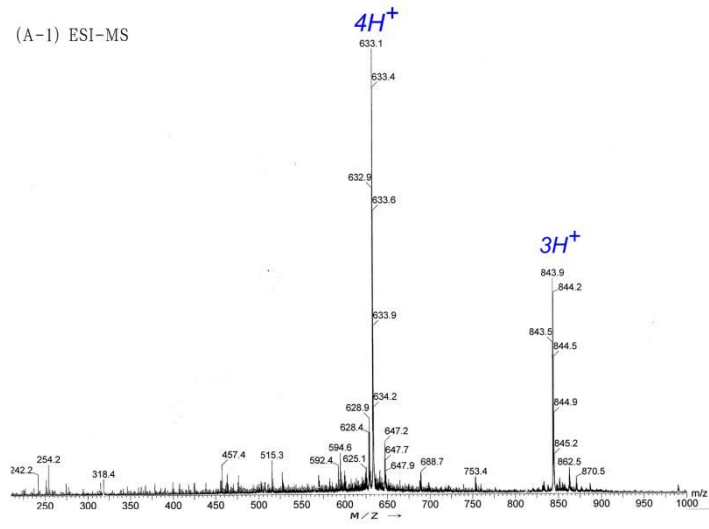

(A-2) ESI-MS

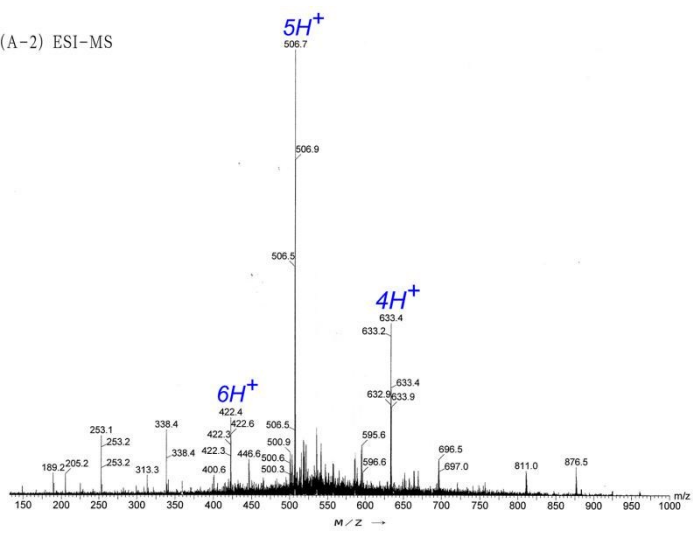

(A-3) ESI-MS

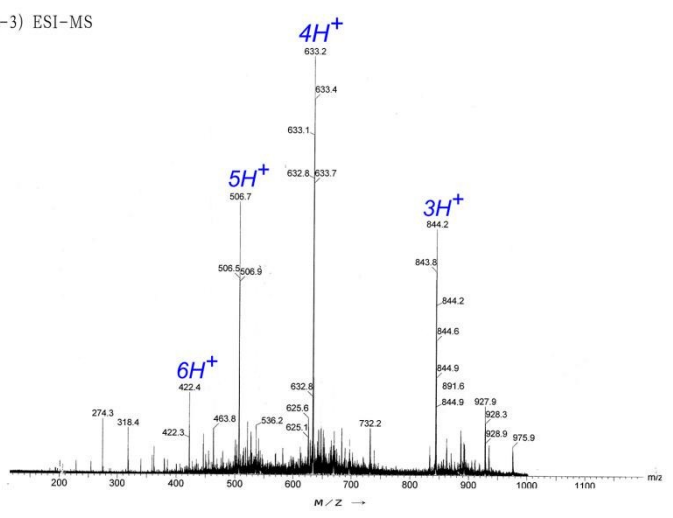

(B-1) HPLC traces (214nm)

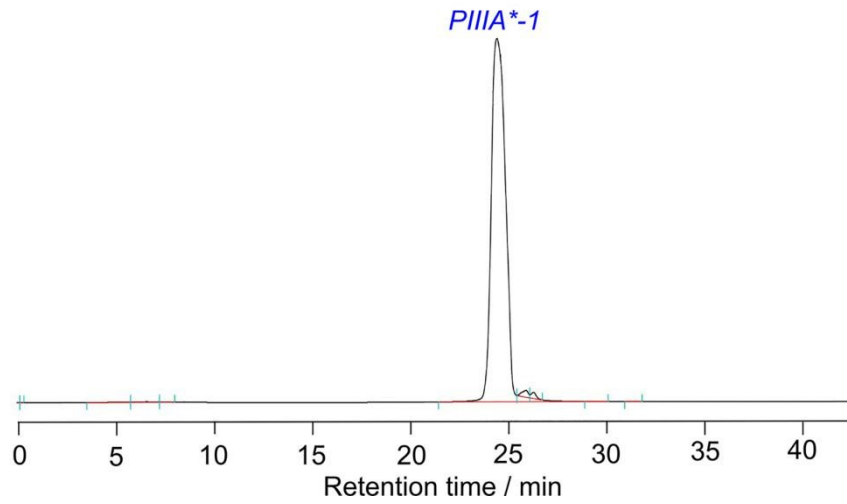

(B-2) HPLC traces (214nm)

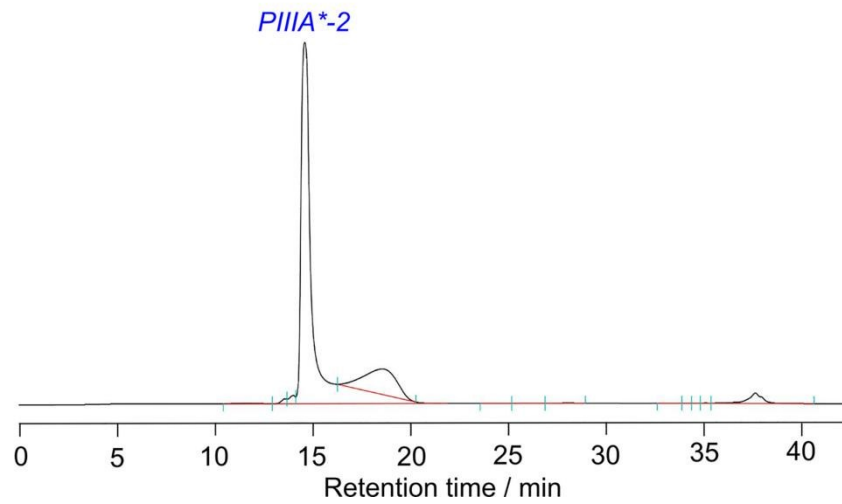

(B-3) HPLC traces (214nm)

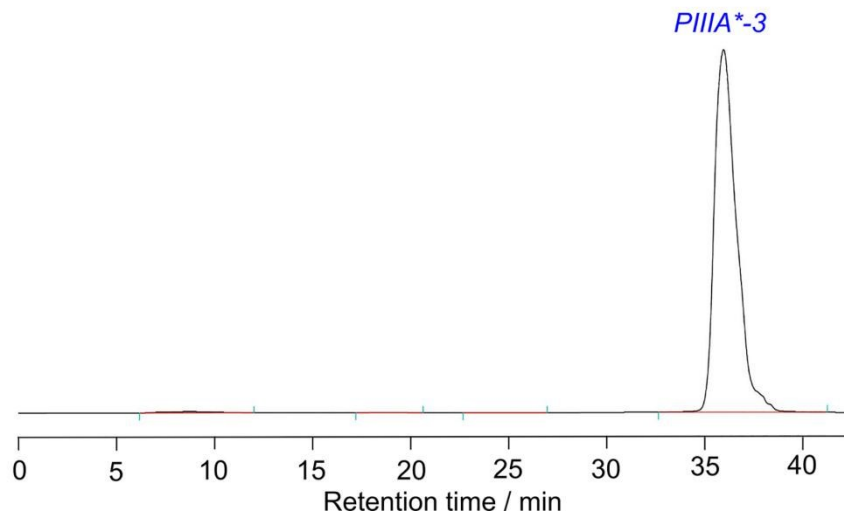

**Figure S2. The Supplementary electrophysiological recording.** A, B, C and D represent the supplementary electrophysiological recording of PIIIA\*, PIIIA\*-1, PIIIA\*-2, and PIIIA\*-3, respectively.

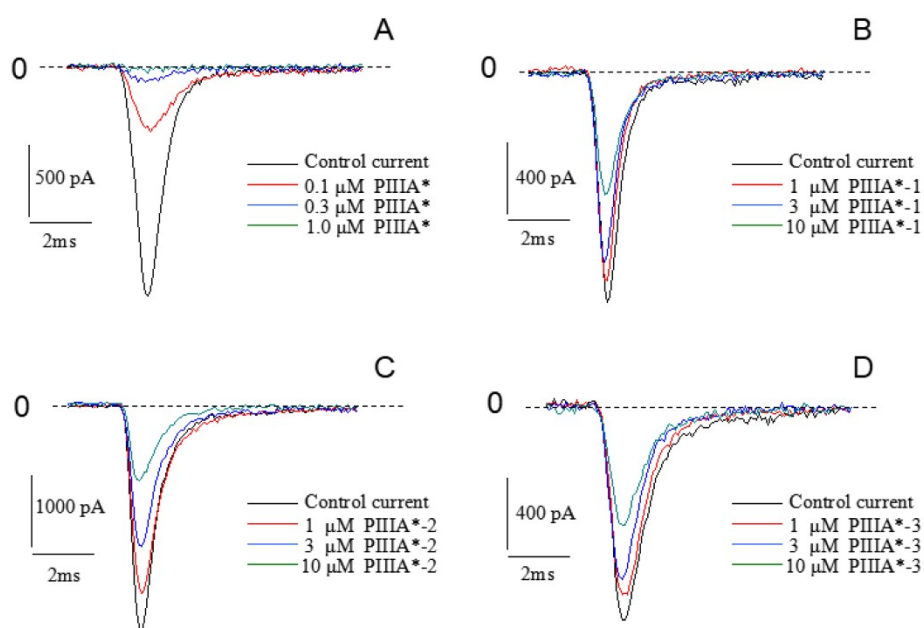

**Figure S3. The RMSD value of the Nav1.4/PI3A\*-1, 2, and 3 system.** (A), (B) and (C) denote RMSD graphs of Nav1.4/PI3A\*-1, Nav1.4/PI3A\*-2 and Nav1.4/PI3A\*-3 respectively. (D) is a superposition diagram for three complex RMSD. In the D diagram, black, red and green represent Nav1.4/PI3A\*-1, Nav1.4/PI3A\*-2 and Nav1.4/PI3A\*-3, respectively.

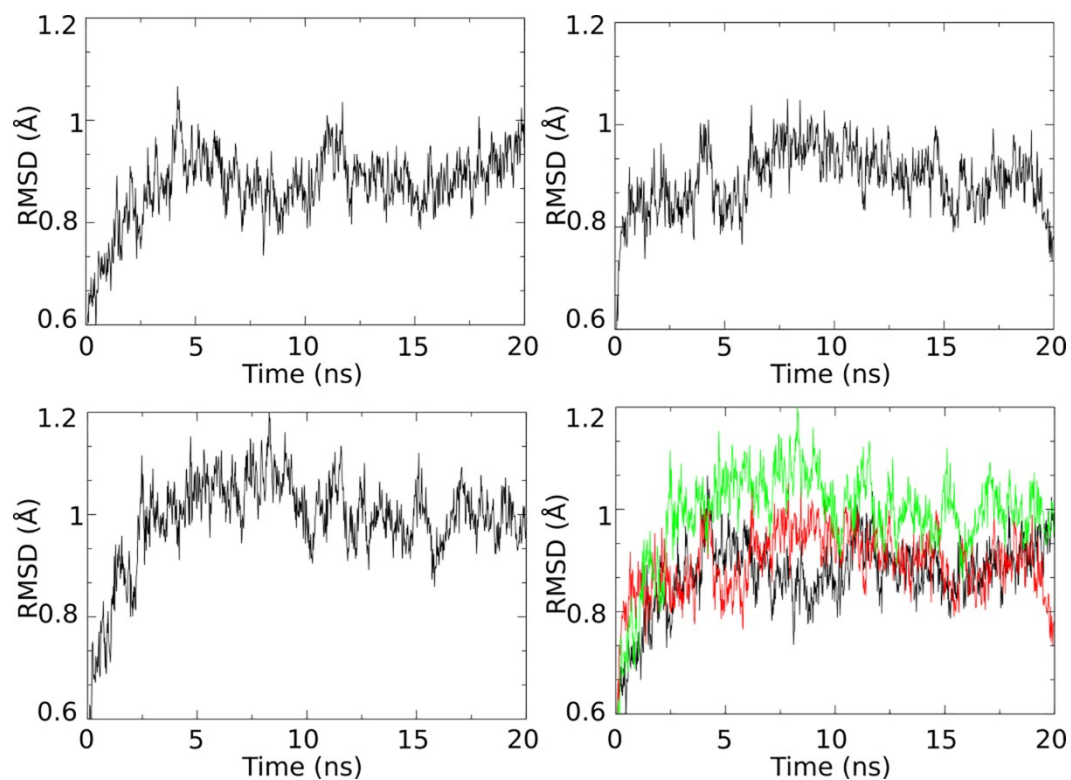

<sup>a</sup> The RMSD value was averaged on five MD trajectories.

**Figure S4. The RMSD value of the PIIIA\*-1.** To determine whether PIIIA\*-1 reached equilibrium at 100 ns, we carried out two MD in 150 ns. According to the RMSD diagram, PIIIA\*-1 had reached equilibrium at 100 ns.

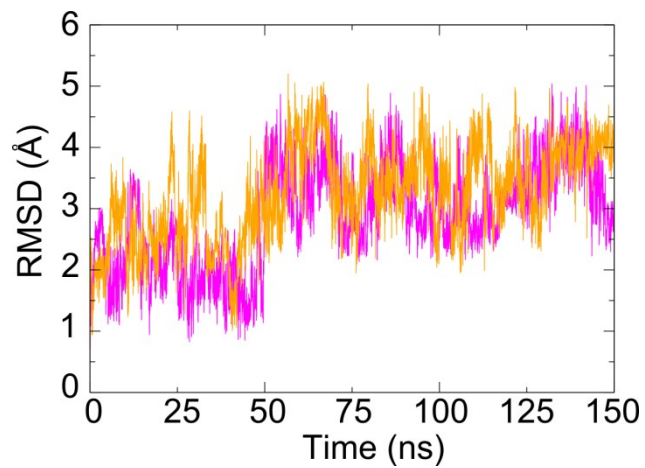

Supplement: c8ra06103c1.pdf [file c8ra06103c1.pdf]
